# Supplementary material for: The fundamental Fuzzy logic operators and some complex Boolean logic circuits implemented by the chromogenism of a spirooxazine
Source: Royal Society of Chemistry journal article supplement (doi:10.1039/c1cp21782h), 2011-01-01
Supplement: c1cp21782h.pdf [file c1cp21782h.pdf]

# The Fundamental Fuzzy Logic Operators and some Complex Boolean Logic Circuits Implemented by the Chromogenism of a Spirooxazine.

Pier Luigi Gentili\*

Dipartimento di Chimica, Università di Perugia, 06123 Perugia (Italy)

pierluigi.gentili@unipg.it

## ELECTRONIC SUPPLEMENTARY INFORMATION

### *Photochromism*

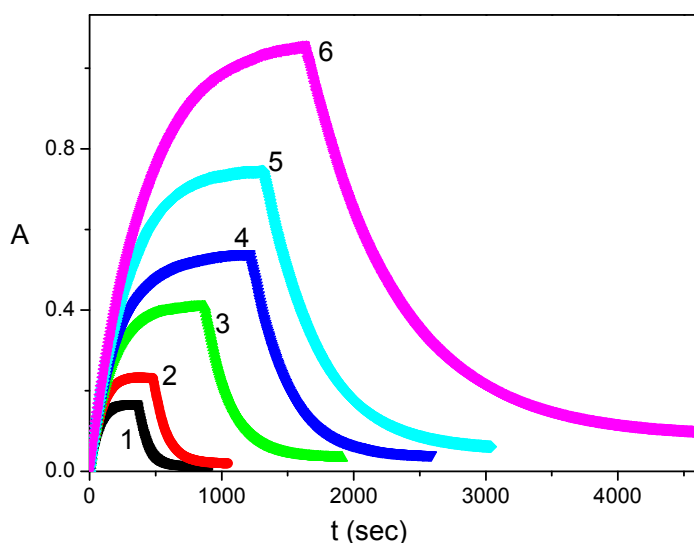

**Figure S.1.** Kinetics of photo-colouration and bleaching recorded at 611 nm and at different temperatures: (1) 298 K, (2) 295 K, (3) 290 K, (4) 287.5 K, (5) 285 K, (6) 280 K. The irradiation of SpO was carried out at 379 nm and the intensity was of the order of  $10^{-7}$  moles of quanta  $\text{dm}^{-3}\text{s}^{-1}$ . The conversion degree of SpO to MC are 5% at 298 K and 34% at 280 K for a SpO's solution having an analytical concentration of  $3.2 \times 10^{-5}$  M.

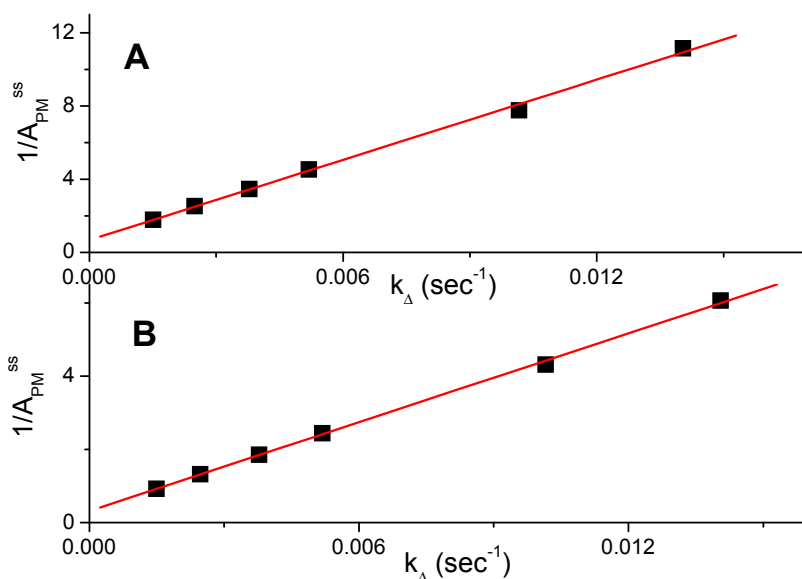

**Figure S.2.** Treatment of the kinetic data,  $A_{MC}^{\infty}$  and  $k_{\Delta}$ , according to equation (6) of the paper. The points of graph (A) are relative to  $\lambda_{an}=580$  nm; they are fitted by a straight line (red trace) having an intercept  $A=(0.68\pm 0.14)$ , a slope  $B=(729.9\pm 18.7)$  and a correlation coefficient  $r=0.99869$ . The points in graph (B) are relative to  $\lambda_{an}=611$  nm; they are fitted by a straight line having an intercept  $A=(0.318\pm 0.046)$ , a slope  $B=(403.9\pm 6.1)$  and a correlation coefficient  $r=0.99955$ .

### Acidichromism

The photochemical transformation describing the acidichromism of SpO is (1s):

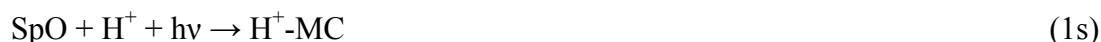

The differential kinetic equation describing the spectral evolution due to the photochemical transformation (1s) is:

$$\frac{dA_{\text{H}^+-\text{MC}}}{dt} = \epsilon_{\text{H}^+-\text{MC}} l \Phi_{\text{H}^+-\text{MC}} I'_{\text{SpO}} \quad (2s)$$

wherein  $A_{\text{H}^+-\text{MC}}$  and  $\epsilon_{\text{H}^+-\text{MC}}$  are the absorbance and the molar absorption coefficient of  $\text{H}^+-\text{MC}$ , respectively;  $\Phi_{\text{H}^+-\text{MC}}$  is the photo-reaction quantum yield;  $l$  is the optical path length and  $I'_{\text{SpO}}$  is the intensity of the radiation absorbed by SpO. Just in the first steps of the chemical transformation, the content of the product can be overlooked. Therefore, equation (2s) can be approximated by the equation (3s), below:

$$\frac{dA_{H^+-MC}}{dt} = \epsilon_{H^+-MC} I \Phi_{H^+-MC} I_0 (1 - 10^{-A'_{SpO}(t=0)}) \quad (3s)$$

wherein  $A'_{SpO}(t=0)$  is the absorbance of SpO at the irradiation wavelength, before starting to irradiate. The value of  $\Phi_{H^+-MC}$  can be determined by using the initial velocity method and equation (3s), if  $\epsilon_{H^+-MC}$  is already known. In case of a prolonged irradiation, equation (3s) is not valid anymore, since  $I'_{SpO}$  has to be expressed by equation (4s):

$$I'_{SpO} = \frac{A'_{SpO}}{A'_{TOT}} (1 - 10^{-A'_{TOT}}) I'_0 = A'_{SpO} F I'_0 \quad (4s)$$

wherein  $A'_{SpO}$  and  $A'_{TOT}$  are the absorbance values of SpO alone, and SpO along with  $H^+-MC$ , respectively, at the irradiation wavelength ( $\lambda_{irr}$ ) and F represents the photo-kinetic factor. F is constant if  $\lambda_{irr}$  corresponds to the wavelength of an isosbestic point. Introducing equation (4s) into equation (2s), we obtain equation (5s):

$$\frac{dA_{H^+-MC}}{dt} = \epsilon_{H^+-MC} I \Phi_{H^+-MC} I'_0 F A'_{SpO} = \epsilon_{H^+-MC} I \Phi_{H^+-MC} I'_0 F \epsilon'_{SpO} I \left( C_0 - \frac{A_{H^+-MC}}{\epsilon_{H^+-MC}} \right) \quad (5s)$$

By separating the variables and integrating between  $[0,t]$  and  $[A_{H^+-MC}(t=0), A_{H^+-MC}(t)]$ , equation (6s) is achieved:

$$A_{H^+-MC}(t) = \epsilon_{H^+-MC} I C_0 - (\epsilon_{H^+-MC} I C_0 - A_{H^+-MC}(t=0)) e^{-\Phi_{H^+-MC} F I'_0 \epsilon'_{SpO} I t} \quad (6s)$$

It becomes equation (8) of the paper when  $A_{H^+-MC}(t=0) = 0$ .

By applying equation (6s), it results that  $\Phi_{H^+-MC} = (0.25 \pm 0.01)$  and  $\epsilon_{H^+-MC}(485 \text{ nm}) = (17600 \pm 250) \text{ M}^{-1} \text{ cm}^{-1}$  for  $\lambda_{irr} = 320 \text{ nm}$ . The value of  $\Phi_{H^+-MC}$  for  $\lambda_{irr} = 379 \text{ nm}$ , determined through the initial velocity method and equation (3s), is equal to that evaluated for  $\lambda_{irr} = 320 \text{ nm}$ .

### Metallochromism

To determine the quantum yield of the photoreaction producing  $Al^{3+}$ -MC and the molar absorption coefficient of the complex, the following procedure was used. The value of the absorbance at the maximum of the colour band (i.e. at 485 nm), recorded at the photo-stationary state (see Figure 3 of the full paper), is  $A'_{TOT}(485 \text{ nm}) = 0.413$ . The contribution of  $H^+-MC$  to  $A'(485 \text{ nm})$  amounts to 9%, as stated into the paper. Therefore, it is possible to estimate the concentration of  $H^+-MC$  at the photo-stationary state:

$$[\text{H}^+ - \text{MC}]^\infty = \frac{0.09(A_{\text{TOT}}^\infty(485\text{nm}))}{\epsilon_{\text{H}^+ - \text{MC}}} \quad (7\text{s})$$

Since the photo-reaction has been carried out at low temperature, where the thermal process of bleaching is negligible, the concentration of  $\text{Al}^{3+}$ -MC can be determined by the difference (8s), assuming a complete conversion of SpO into the two coloured products:

$$[\text{Al}^{3+} - \text{MC}]^\infty = C_0 - [\text{H}^+ - \text{MC}]^\infty \quad (8\text{s}).$$

When  $[\text{Al}^{3+} - \text{MC}]^\infty$  is known, it is possible to determine  $\epsilon_{\text{Al}^{3+} - \text{MC}}$  and  $\Phi_{\text{Al}^{3+} - \text{MC}}$  through the equations (9s) and (10s), respectively:

$$\epsilon_{\text{Al}^{3+} - \text{MC}} = \frac{A_{\text{TOT}}^\infty(485\text{nm})(1 - 0.09)}{[\text{Al}^{3+} - \text{MC}]^\infty} \quad (9\text{s})$$

$$\Phi_{\text{Al}^{3+} - \text{MC}} = \frac{[\text{Al}^{3+} - \text{MC}]^\infty}{I_0 \Delta t (1 - 10^{-A_{\text{TOT}}'})} \quad (10\text{s})$$

wherein  $I_0$  is the intensity of the irradiation source,  $A_{\text{TOT}}'$  is the total absorbance at the isosbestic point, and  $\Delta t$  is the time interval of irradiation.

**(1) Spectra recorded at the photo-stationary states in the presence of  $\text{HClO}_4$  and  $\text{Cu}(\text{ClO}_4)_2$ :**

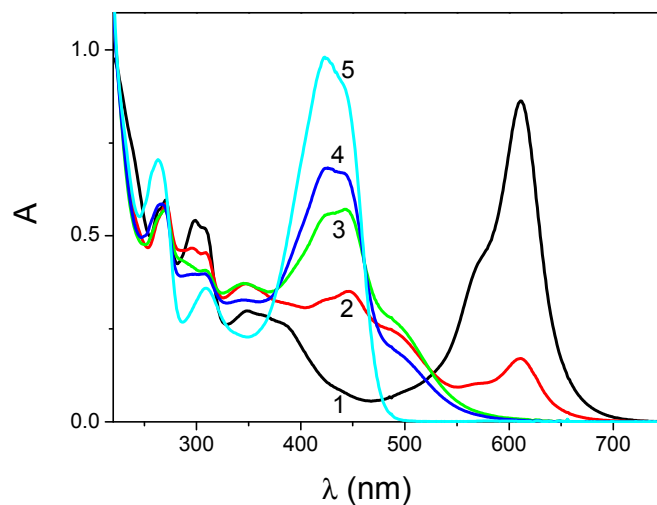

**Figure S.3.** Absorption spectra recorded at the photo-stationary state for different molar ratios of  $\text{HClO}_4$  to  $\text{SpO}$  ( $n_{\text{H}^+}/n_{\text{SpO}} = r_1$ ) and  $\text{Cu}(\text{ClO}_4)_2$  to  $\text{SpO}$  ( $n_{\text{Cu}^{2+}}/n_{\text{SpO}} = r_2$ ). Spectra: 1 (black) for  $r_1=0$ ,  $r_2=0$ ; 2 (red) for  $r_1=0.33$ ,  $r_2=0.33$ ; 3 (green) for  $r_1=0.33$ ,  $r_2=0.66$ ; 4 (blue) for  $r_1=0.33$ ,  $r_2=1$ ; 5 (cyan) for  $r_1=0.33$ ,  $r_2=1.5$ .

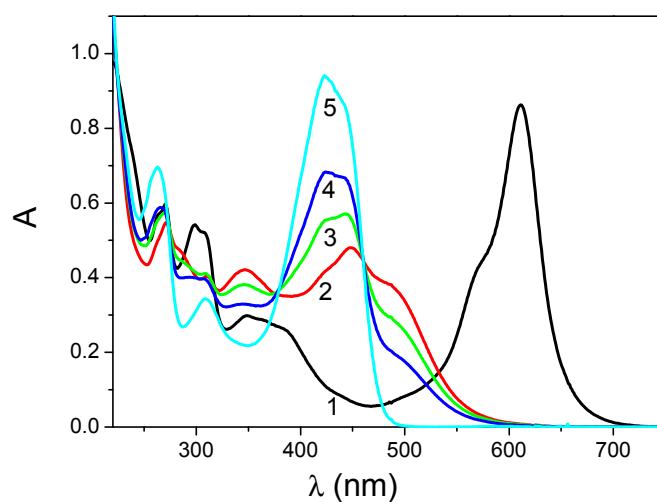

**Figure S.4.** Absorption spectra recorded at the photo-stationary state for different molar ratios of  $\text{HClO}_4$  to  $\text{SpO}$  ( $n_{\text{H}^+}/n_{\text{SpO}} = r_1$ ) and  $\text{Cu}(\text{ClO}_4)_2$  to  $\text{SpO}$  ( $n_{\text{Cu}^{2+}}/n_{\text{SpO}} = r_2$ ). Spectra: 1 (black) for  $r_1=0$ ,  $r_2=0$ ; 2 (red) for  $r_1=0.66$ ,  $r_2=0.33$ ; 3 (green) for  $r_1=0.66$ ,  $r_2=0.66$ ; 4 (blue) for  $r_1=0.66$ ,  $r_2=1$ ; 5 (cyan) for  $r_1=0.66$ ,  $r_2=1.5$ .

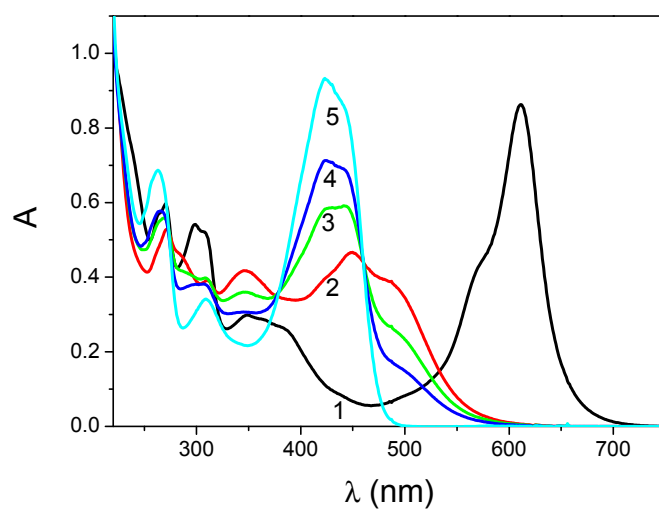

**Figure S.5.** Absorption spectra recorded at the photo-stationary state for different molar ratios of  $\text{HClO}_4$  to  $\text{SpO}$  ( $n_{\text{H}^+}/n_{\text{SpO}} = r_1$ ) and  $\text{Cu}(\text{ClO}_4)_2$  to  $\text{SpO}$  ( $n_{\text{Cu}^{2+}}/n_{\text{SpO}} = r_2$ ). Spectra: 1 (black) for  $r_1=0$ ,  $r_2=0$ ; 2 (red) for  $r_1=1$ ,  $r_2=0.33$ ; 3 (green) for  $r_1=1$ ,  $r_2=0.66$ ; 4 (blue) for  $r_1=1$ ,  $r_2=1$ ; 5 (cyan) for  $r_1=1$ ,  $r_2=1.5$ .

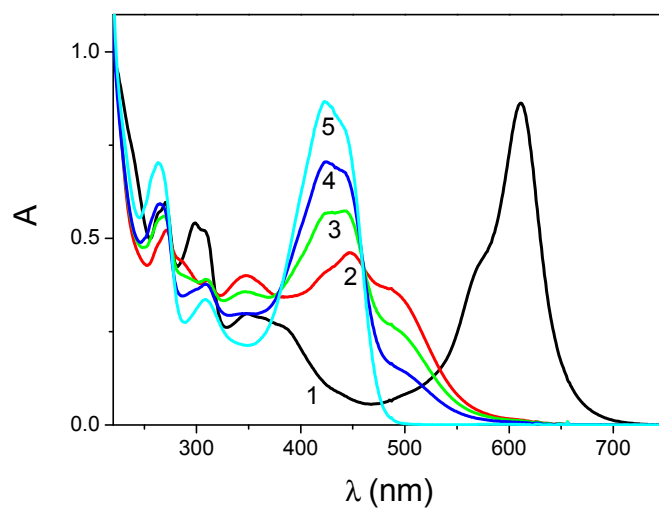

**Figure S.6.** Absorption spectra recorded at the photo-stationary state for different molar ratios of  $\text{HClO}_4$  to  $\text{SpO}$  ( $n_{\text{H}^+}/n_{\text{SpO}} = r_1$ ) and  $\text{Cu}(\text{ClO}_4)_2$  to  $\text{SpO}$  ( $n_{\text{Cu}^{2+}}/n_{\text{SpO}} = r_2$ ). Spectra: 1 (black) for  $r_1=0$ ,  $r_2=0$ ; 2 (red) for  $r_1=1.5$ ,  $r_2=0.33$ ; 3 (green) for  $r_1=1.5$ ,  $r_2=0.66$ ; 4 (blue) for  $r_1=1.5$ ,  $r_2=1$ ; 5 (cyan) for  $r_1=1.5$ ,  $r_2=1.5$ .

**(2) Spectra recorded at the photo-stationary states in the presence of  $\text{HClO}_4$  and  $\text{AlCl}_3$ :**

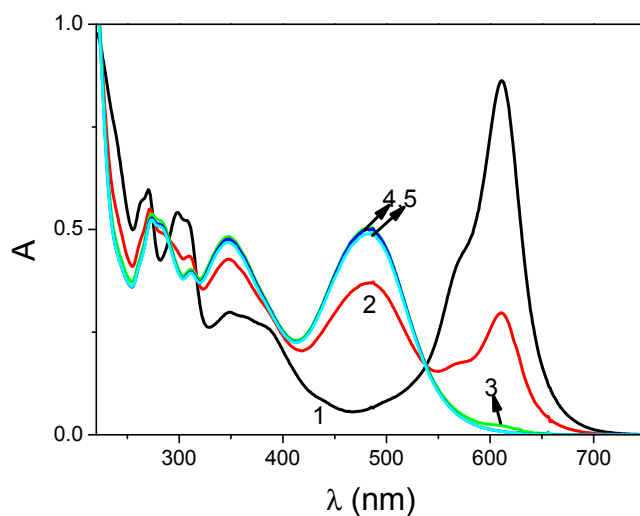

**Figure S.7.** Absorption spectra recorded at the photo-stationary state for different molar ratios of  $\text{HClO}_4$  to  $\text{SpO}$  ( $n_{\text{H}^+} / n_{\text{SpO}} = r_1$ ) and  $\text{AlCl}_3$  to  $\text{SpO}$  ( $n_{\text{Al}^{3+}} / n_{\text{SpO}} = r_3$ ). Spectra: 1 (black) for  $r_1=0$ ,  $r_3=0$ ; 2 (red) for  $r_1=0.33$ ,  $r_3=0.18$ ; 3 (green) for  $r_1=0.33$ ,  $r_3=0.33$ ; 4 (blue) for  $r_1=0.33$ ,  $r_3=0.67$ ; 5 (cyan) for  $r_1=0.33$ ,  $r_3=1$ .

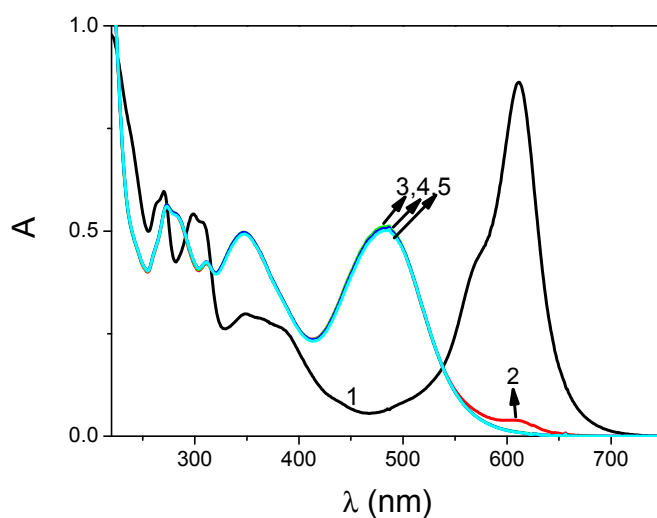

**Figure S.8.** Absorption spectra recorded at the photo-stationary state for different molar ratios of  $\text{HClO}_4$  to  $\text{SpO}$  ( $n_{\text{H}^+} / n_{\text{SpO}} = r_1$ ) and  $\text{AlCl}_3$  to  $\text{SpO}$  ( $n_{\text{Al}^{3+}} / n_{\text{SpO}} = r_3$ ). Spectra: 1 (black) for  $r_1=0$ ,  $r_3=0$ ; 2 (red) for  $r_1=0.7$ ,  $r_3=0.18$ ; 3 (green) for  $r_1=0.7$ ,  $r_3=0.35$ ; 4 (blue) for  $r_1=0.7$ ,  $r_3=0.65$ ; 5 (cyan) for  $r_1=0.7$ ,  $r_3=1$ .

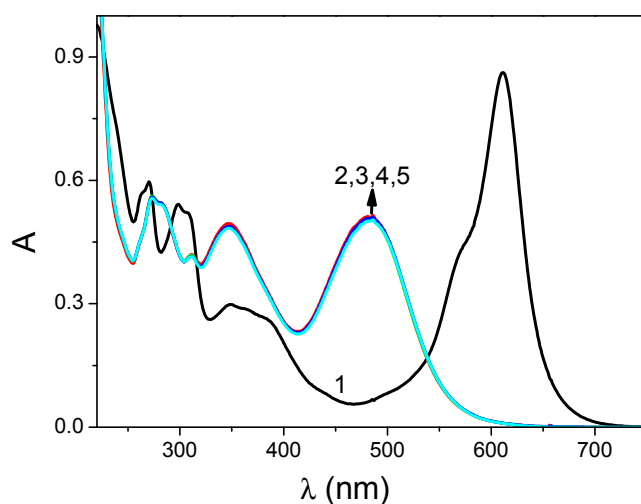

**Figure S.9.** Absorption spectra recorded at the photo-stationary state for different molar ratios of HClO<sub>4</sub> to SpO ( $n_{\text{H}^+}/n_{\text{SpO}} = r_1$ ) and AlCl<sub>3</sub> to SpO ( $n_{\text{Al}^{3+}}/n_{\text{SpO}} = r_3$ ). Spectra: 1 (black) for  $r_1=0$ ,  $r_3=0$ ; 2 (red) for  $r_1=1$ ,  $r_3=0.18$ ; 3 (green) for  $r_1=1$ ,  $r_3=0.35$ ; 4 (blue) for  $r_1=1$ ,  $r_3=0.65$ ; 5 (cyan) for  $r_1=1$ ,  $r_3=1$ .

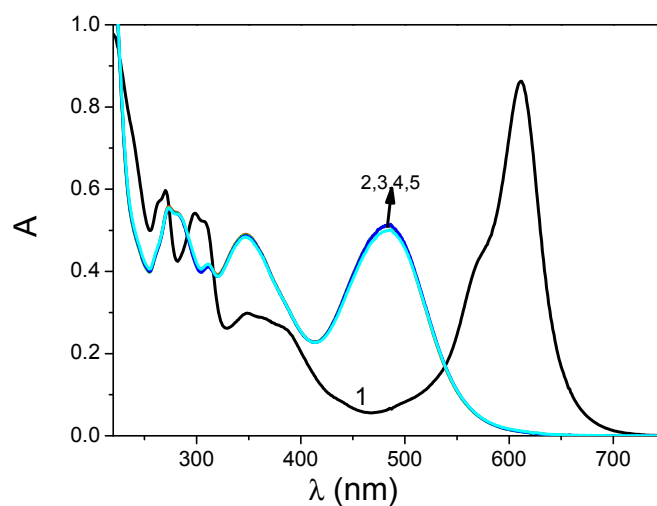

**Figure S.10.** Absorption spectra recorded at the photo-stationary state for different molar ratios of HClO<sub>4</sub> to SpO ( $n_{\text{H}^+}/n_{\text{SpO}} = r_1$ ) and AlCl<sub>3</sub> to SpO ( $n_{\text{Al}^{3+}}/n_{\text{SpO}} = r_3$ ). Spectra: 1 (black) for  $r_1=0$ ,  $r_3=0$ ; 2 (red) for  $r_1=1.6$ ,  $r_3=0.18$ ; 3 (green) for  $r_1=1.6$ ,  $r_3=0.35$ ; 4 (blue) for  $r_1=1.6$ ,  $r_3=0.65$ ; 5 (cyan) for  $r_1=1.6$ ,  $r_3=1$ .



**(3) Spectra recorded at the photo-stationary states in the presence of  $\text{AlCl}_3$  and  $\text{Cu}(\text{ClO}_4)_2$ :**

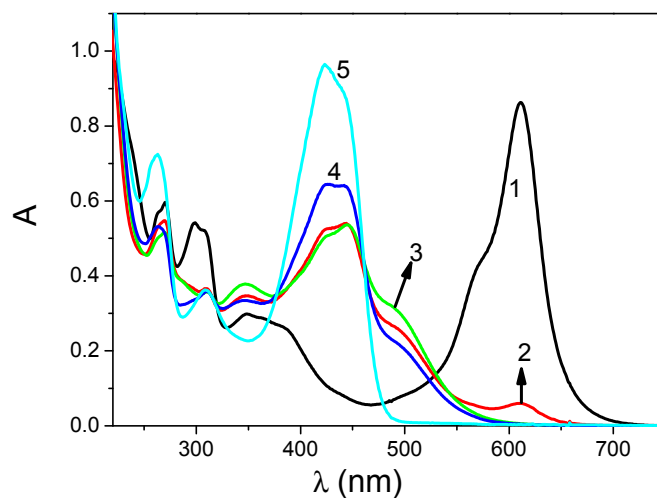

**Figure S.11.** Absorption spectra recorded at the photo-stationary state for different molar ratios of  $\text{AlCl}_3$  to  $\text{SpO}$  ( $n_{\text{Al}^{3+}} / n_{\text{SpO}} = r_3$ ) and  $\text{Cu}(\text{ClO}_4)_2$  to  $\text{SpO}$  ( $n_{\text{Cu}^{2+}} / n_{\text{SpO}} = r_2$ ). Spectra: 1 (black) for  $r_3=0$ ,  $r_2=0$ ; 2 (red) for  $r_3=0.33$ ,  $r_2=0.33$ ; 3 (green) for  $r_3=0.33$ ,  $r_2=0.66$ ; 4 (blue) for  $r_3=0.33$ ,  $r_2=1$ ; 5 (cyan) for  $r_3=0.33$ ,  $r_2=1.5$ .

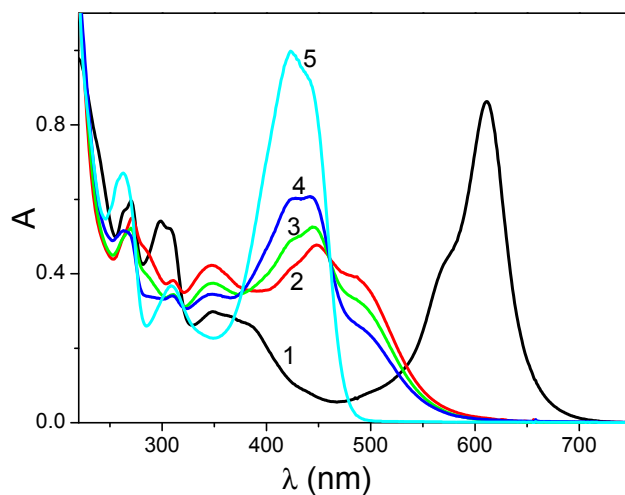

**Figure S.12.** Absorption spectra recorded at the photo-stationary state for different molar ratios of  $\text{AlCl}_3$  to  $\text{SpO}$  ( $n_{\text{Al}^{3+}} / n_{\text{SpO}} = r_3$ ) and  $\text{Cu}(\text{ClO}_4)_2$  to  $\text{SpO}$  ( $n_{\text{Cu}^{2+}} / n_{\text{SpO}} = r_2$ ). Spectra: 1 (black) for  $r_3=0$ ,  $r_2=0$ ; 2 (red) for  $r_3=0.66$ ,  $r_2=0.33$ ; 3 (green) for  $r_3=0.66$ ,  $r_2=0.66$ ; 4 (blue) for  $r_3=0.66$ ,  $r_2=1$ ; 5 (cyan) for  $r_3=0.66$ ,  $r_2=1.5$ .

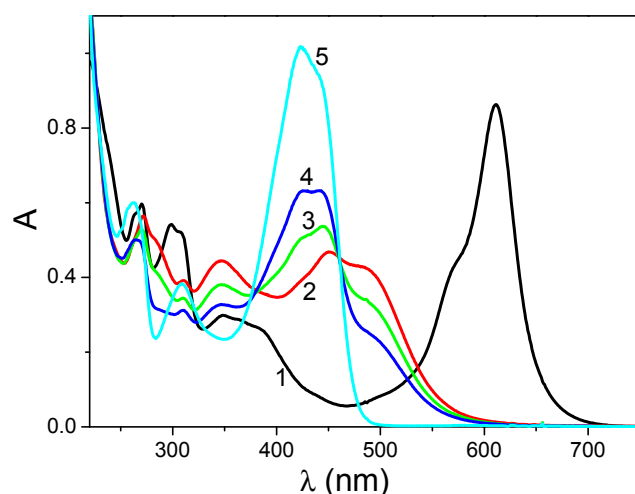

**Figure S.13.** Absorption spectra recorded at the photo-stationary state for different molar ratios of  $\text{AlCl}_3$  to  $\text{SpO}$  ( $n_{\text{Al}^{3+}}/n_{\text{SpO}} = r_3$ ) and  $\text{Cu}(\text{ClO}_4)_2$  to  $\text{SpO}$  ( $n_{\text{Cu}^{2+}}/n_{\text{SpO}} = r_2$ ). Spectra: 1 (black) for  $r_3=0$ ,  $r_2=0$ ; 2 (red) for  $r_3=1$ ,  $r_2=0.33$ ; 3 (green) for  $r_3=1$ ,  $r_2=0.66$ ; 4 (blue) for  $r_3=1$ ,  $r_2=1$ ; 5 (cyan) for  $r_3=1$ ,  $r_2=1.5$ .

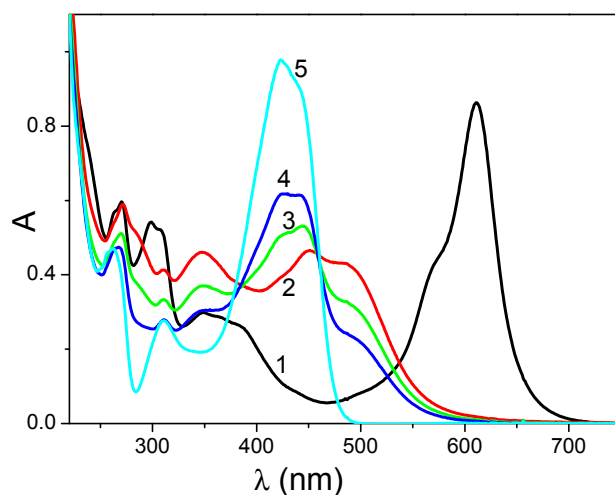

**Figure S.14.** Absorption spectra recorded at the photo-stationary state for different molar ratios of  $\text{AlCl}_3$  to  $\text{SpO}$  ( $n_{\text{Al}^{3+}}/n_{\text{SpO}} = r_3$ ) and  $\text{Cu}(\text{ClO}_4)_2$  to  $\text{SpO}$  ( $n_{\text{Cu}^{2+}}/n_{\text{SpO}} = r_2$ ). Spectra: 1 (black) for  $r_3=0$ ,  $r_2=0$ ; 2 (red) for  $r_3=1.5$ ,  $r_2=0.33$ ; 3 (green) for  $r_3=1.5$ ,  $r_2=0.66$ ; 4 (blue) for  $r_3=1.5$ ,  $r_2=1$ ; 5 (cyan) for  $r_3=1.5$ ,  $r_2=1.5$ .

**Table S1.** Values of the tristimulus variables X, Y, Z and the RGB colour coordinates as function of the  $n_{\text{H}^+} / n_{\text{SpO}}$  and  $n_{\text{Al}^{3+}} / n_{\text{SpO}}$  molar ratios.

| $n_{\text{H}^+} / n_{\text{SpO}}$ | $n_{\text{Al}^{3+}} / n_{\text{SpO}}$ | X      | Y      | Z      | R    | G   | B    |
|-----------------------------------|---------------------------------------|--------|--------|--------|------|-----|------|
| 0                                 | 0                                     | 0.4324 | 0.5487 | 0.8977 | 28.1 | 165 | 220  |
| 0.33                              | 0                                     | 0.4351 | 0.5268 | 0.7358 | 59.5 | 152 | 177  |
| 0.7                               | 0                                     | 0.5574 | 0.5952 | 0.5759 | 154  | 153 | 132  |
| 1                                 | 0                                     | 0.7746 | 0.7226 | 0.4473 | 255  | 159 | 94.0 |
| 1.5                               | 0                                     | 0.7761 | 0.7213 | 0.4507 | 255  | 158 | 95.0 |
| 0                                 | 0.18                                  | 0.4358 | 0.5167 | 0.6998 | 68.7 | 147 | 168  |
| 0                                 | 0.35                                  | 0.5746 | 0.5911 | 0.5396 | 175  | 146 | 123  |
| 0                                 | 0.65                                  | 0.7552 | 0.7035 | 0.4554 | 255  | 155 | 96.9 |
| 0                                 | 1                                     | 0.7656 | 0.7099 | 0.4420 | 255  | 155 | 93.1 |
| 0                                 | 1.5                                   | 0.7721 | 0.7173 | 0.4463 | 255  | 157 | 94.0 |
| 0.33                              | 0.18                                  | 0.5884 | 0.6108 | 0.5503 | 177  | 153 | 125  |
| 0.33                              | 0.33                                  | 0.7651 | 0.7142 | 0.4532 | 255  | 157 | 95.9 |
| 0.33                              | 0.66                                  | 0.7795 | 0.7255 | 0.4570 | 255  | 159 | 96.5 |
| 0.33                              | 1                                     | 0.7813 | 0.7286 | 0.4627 | 255  | 160 | 97.9 |
| 0.7                               | 0.18                                  | 0.7497 | 0.7048 | 0.4467 | 255  | 157 | 94.4 |
| 0.7                               | 0.35                                  | 0.7748 | 0.7215 | 0.4458 | 255  | 158 | 93.6 |
| 0.7                               | 0.65                                  | 0.7756 | 0.7216 | 0.4495 | 255  | 158 | 94.6 |
| 0.7                               | 1                                     | 0.7770 | 0.7225 | 0.4553 | 255  | 158 | 96.2 |
| 1                                 | 0.18                                  | 0.7765 | 0.7227 | 0.4478 | 255  | 159 | 94.2 |
| 1                                 | 0.35                                  | 0.7774 | 0.7233 | 0.4560 | 255  | 159 | 96.3 |
| 1                                 | 0.65                                  | 0.7751 | 0.7192 | 0.4527 | 255  | 157 | 95.6 |
| 1                                 | 1                                     | 0.7777 | 0.7216 | 0.4591 | 255  | 158 | 97.3 |
| 1.6                               | 0.18                                  | 0.7755 | 0.7205 | 0.4520 | 255  | 158 | 95.4 |
| 1.6                               | 0.35                                  | 0.7758 | 0.7198 | 0.4523 | 255  | 157 | 95.5 |
| 1.6                               | 0.65                                  | 0.7750 | 0.7178 | 0.4530 | 255  | 157 | 95.8 |
| 1.6                               | 1                                     | 0.7747 | 0.7190 | 0.4607 | 255  | 157 | 97.8 |

**Table S2.** Values of the tristimulus variables X, Y, Z and the RGB colour coordinates as function of the  $n_{\text{H}^+} / n_{\text{SpO}}$ ,  $n_{\text{Cu}^{2+}} / n_{\text{SpO}}$  molar ratios.

| $n_{\text{H}^+} / n_{\text{SpO}}$ | $n_{\text{Cu}^{2+}} / n_{\text{SpO}}$ | X       | Y       | Z       | R    | G   | B    |
|-----------------------------------|---------------------------------------|---------|---------|---------|------|-----|------|
| 0                                 | 0                                     | 0.4324  | 0.5487  | 0.8977  | 28.1 | 165 | 220  |
| 0.33                              | 0                                     | 0.4351  | 0.5268  | 0.7358  | 59.5 | 152 | 177  |
| 0.7                               | 0                                     | 0.5574  | 0.5952  | 0.5759  | 154  | 153 | 132  |
| 1                                 | 0                                     | 0.7746  | 0.7226  | 0.4473  | 255  | 159 | 94.0 |
| 1.5                               | 0                                     | 0.7761  | 0.7213  | 0.4507  | 255  | 158 | 95.0 |
| 0                                 | 0.33                                  | 0.5245  | 0.6473  | 0.6516  | 96.9 | 187 | 149  |
| 0                                 | 0.67                                  | 0.65684 | 0.75616 | 0.45321 | 189  | 204 | 92.2 |
| 0                                 | 1                                     | 0.7536  | 0.8204  | 0.3810  | 253  | 210 | 70.7 |
| 0                                 | 1.5                                   | 0.8115  | 0.9571  | 0.3692  | 248  | 255 | 61.3 |
| 0.33                              | 0.33                                  | 0.6777  | 0.7297  | 0.5276  | 207  | 187 | 114  |
| 0.33                              | 0.66                                  | 0.7857  | 0.8162  | 0.3804  | 255  | 200 | 71.2 |
| 0.33                              | 1                                     | 0.7932  | 0.8548  | 0.3680  | 255  | 217 | 66.0 |
| 0.33                              | 1.5                                   | 0.8142  | 0.9618  | 0.3762  | 248  | 255 | 62.9 |
| 0.67                              | 0.33                                  | 0.7798  | 0.7722  | 0.4010  | 255  | 181 | 79.0 |
| 0.67                              | 0.66                                  | 0.7836  | 0.8087  | 0.3758  | 255  | 197 | 70.4 |
| 0.67                              | 1                                     | 0.7915  | 0.8513  | 0.3669  | 255  | 216 | 65.9 |
| 0.67                              | 1.5                                   | 0.8165  | 0.9631  | 0.3878  | 248  | 255 | 66.0 |
| 1                                 | 0.33                                  | 0.7823  | 0.7702  | 0.4092  | 255  | 179 | 81.3 |
| 1                                 | 0.66                                  | 0.7879  | 0.8219  | 0.3758  | 255  | 202 | 69.7 |
| 1                                 | 1                                     | 0.7969  | 0.8680  | 0.3708  | 255  | 222 | 66.1 |
| 1                                 | 1.5                                   | 0.8182  | 0.9653  | 0.3909  | 248  | 255 | 66.8 |
| 1.5                               | 0.33                                  | 0.7757  | 0.7670  | 0.4159  | 255  | 180 | 83.2 |
| 1.5                               | 0.66                                  | 0.7803  | 0.8107  | 0.3841  | 255  | 199 | 72.4 |
| 1.5                               | 1                                     | 0.7944  | 0.8679  | 0.3807  | 255  | 223 | 68.8 |
| 1.5                               | 1.5                                   | 0.8205  | 0.9639  | 0.4114  | 248  | 255 | 72.4 |

**Table S3.** Values of the tristimulus variables X, Y, Z and the RGB colour coordinates as function of the  $n_{\text{Al}^{3+}}/n_{\text{SpO}}$ ,  $n_{\text{Cu}^{2+}}/n_{\text{SpO}}$  molar ratios.

| $n_{\text{Al}^{3+}}/n_{\text{SpO}}$ | $n_{\text{Cu}^{2+}}/n_{\text{SpO}}$ | X       | Y       | Z       | R    | G   | B    |
|-------------------------------------|-------------------------------------|---------|---------|---------|------|-----|------|
| 0                                   | 0                                   | 0.4324  | 0.5487  | 0.8977  | 28.1 | 165 | 220  |
| 0.18                                | 0                                   | 0.4358  | 0.5167  | 0.6998  | 68.7 | 147 | 168  |
| 0.35                                | 0                                   | 0.5746  | 0.5911  | 0.5396  | 175  | 146 | 123  |
| 0.65                                | 0                                   | 0.7552  | 0.7035  | 0.4554  | 255  | 155 | 96.9 |
| 1                                   | 0                                   | 0.7656  | 0.7099  | 0.4420  | 255  | 155 | 93.1 |
| 1.5                                 | 0                                   | 0.7721  | 0.7173  | 0.4463  | 255  | 157 | 94.0 |
| 0                                   | 0.33                                | 0.5245  | 0.6473  | 0.6516  | 96.9 | 187 | 149  |
| 0                                   | 0.67                                | 0.65684 | 0.75616 | 0.45321 | 189  | 204 | 92.2 |
| 0                                   | 1                                   | 0.7536  | 0.8204  | 0.3810  | 253  | 210 | 70.7 |
| 0                                   | 1.5                                 | 0.8115  | 0.9571  | 0.3692  | 248  | 255 | 61.3 |
| 0.33                                | 0.33                                | 0.7398  | 0.7785  | 0.3998  | 255  | 194 | 77.8 |
| 0.33                                | 0.66                                | 0.7835  | 0.7959  | 0.3845  | 255  | 191 | 73.4 |
| 0.33                                | 1                                   | 0.7892  | 0.8364  | 0.3663  | 255  | 209 | 66.4 |
| 0.33                                | 1.5                                 | 0.8098  | 0.9525  | 0.3771  | 248  | 255 | 63.6 |
| 0.66                                | 0.33                                | 0.7712  | 0.7582  | 0.4005  | 255  | 176 | 79.5 |
| 0.66                                | 0.66                                | 0.78109 | 0.7889  | 0.3877  | 255  | 188 | 74.6 |
| 0.66                                | 1                                   | 0.7799  | 0.8142  | 0.3689  | 255  | 201 | 68.2 |
| 0.66                                | 1.5                                 | 0.8120  | 0.9586  | 0.3708  | 248  | 255 | 61.6 |
| 1                                   | 0.33                                | 0.7657  | 0.7414  | 0.3994  | 255  | 170 | 80.0 |
| 1                                   | 0.66                                | 0.7753  | 0.7826  | 0.3793  | 255  | 187 | 72.5 |
| 1                                   | 1                                   | 0.7811  | 0.8200  | 0.3618  | 255  | 203 | 66.0 |
| 1                                   | 1.5                                 | 0.8096  | 0.9575  | 0.3672  | 247  | 255 | 60.7 |
| 1.5                                 | 0.33                                | 0.7562  | 0.7291  | 0.3990  | 255  | 166 | 80.4 |
| 1.5                                 | 0.66                                | 0.7747  | 0.7819  | 0.3863  | 255  | 187 | 74.5 |
| 1.5                                 | 1                                   | 0.7867  | 0.8261  | 0.3768  | 255  | 205 | 69.8 |
| 1.5                                 | 1.5                                 | 0.8168  | 0.9663  | 0.3808  | 248  | 255 | 64.0 |

**Rules for the Fuzzy Logic System  $FLS_1$  having  $H^+$  and  $Al^{3+}$  as inputs**

When the action of the chemical inputs  $H^+$  and  $Al^{3+}$  are combined, a FLS based upon the rules' matrix shown in Table 5 of the main paper can be implemented.

The rules are the following statements:

- (1) IF  $n_{H^+}/n_{SpO}$  AND  $n_{Al^{3+}}/n_{SpO}$  are null, THEN the colour is Blue;
- (2) IF  $n_{H^+}/n_{SpO}$  is low OR  $n_{Al^{3+}}/n_{SpO}$  is low, THEN the colour is Blue-Green, i.e. cyan;
- (3) IF  $n_{H^+}/n_{SpO}$  is medium OR  $n_{Al^{3+}}/n_{SpO}$  is medium, THEN the solution is Red-Green-Blue, i.e. grey;
- (4) IF  $n_{H^+}/n_{SpO}$  is high OR  $n_{Al^{3+}}/n_{SpO}$  is high, THEN the solution is Red;
- (5) IF  $n_{H^+}/n_{SpO}$  is very high OR  $n_{Al^{3+}}/n_{SpO}$  is very high, THEN the solution is Red;
- (6) IF  $n_{H^+}/n_{SpO}$  is low AND  $n_{Al^{3+}}/n_{SpO}$  is low, THEN the solution is Red-Green, i.e. yellow;
- (7) IF  $n_{H^+}/n_{SpO}$  is low AND  $n_{Al^{3+}}/n_{SpO}$  is NOT low, THEN the solution is Red;
- (8) IF  $n_{Al^{3+}}/n_{SpO}$  is low AND  $n_{H^+}/n_{SpO}$  is NOT low, THEN the solution is Red;
- (9) IF  $n_{Al^{3+}}/n_{SpO}$  is medium AND  $n_{H^+}/n_{SpO}$  is NOT low, THEN the solution is Red;
- (10) IF  $n_{Al^{3+}}/n_{SpO}$  is high AND  $n_{H^+}/n_{SpO}$  is NOT low, THEN the solution is Red;
- (11) IF  $n_{Al^{3+}}/n_{SpO}$  is very high AND  $n_{H^+}/n_{SpO}$  is NOT low, THEN the solution is Red.

### **Rules for the Fuzzy Logic System $FLS_2$ having $H^+$ and $Cu^{2+}$ as inputs**

In the case of the chemical inputs  $H^+$  and  $Cu^{2+}$ , a new FLS can be implemented, whose rules' matrix is shown in Table 6 of the paper.

The rules are the following statements:

- (1) IF  $n_{H^+}/n_{SpO}$  AND  $n_{Cu^{2+}}/n_{SpO}$  are null, THEN the solution is Blue;
- (2) IF  $n_{Cu^{2+}}/n_{SpO}$  is low AND  $n_{H^+}/n_{SpO}$  is null, THEN the solution is Green;
- (3) IF  $n_{Cu^{2+}}/n_{SpO}$  is medium AND  $n_{H^+}/n_{SpO}$  is null, THEN the solution is Green-Red, i.e. yellow;
- (4) IF  $n_{Cu^{2+}}/n_{SpO}$  is high AND  $n_{H^+}/n_{SpO}$  is null, THEN the solution is Red-Green, i.e. yellow;
- (5) IF  $n_{Cu^{2+}}/n_{SpO}$  is very high, THEN the solution is Green-Red, i.e. yellow;
- (6) IF  $n_{H^+}/n_{SpO}$  is low AND  $n_{Cu^{2+}}/n_{SpO}$  is null, THEN the solution is Blue-Green, i.e. cyan;
- (7) IF  $n_{H^+}/n_{SpO}$  is medium AND  $n_{Cu^{2+}}/n_{SpO}$  is null, THEN the solution is Red-Green-Blue i.e. grey;
- (8) IF  $n_{H^+}/n_{SpO}$  is high AND  $n_{Cu^{2+}}/n_{SpO}$  is null, THEN the solution is Red;
- (9) IF  $n_{H^+}/n_{SpO}$  is very high AND  $n_{Cu^{2+}}/n_{SpO}$  is null, THEN the solution is Red;
- (10) IF  $n_{H^+}/n_{SpO}$  is low AND  $n_{Cu^{2+}}/n_{SpO}$  is low, THEN the solution is Red-Green, i.e. yellow;
- (11) IF  $n_{H^+}/n_{SpO}$  is medium AND  $n_{Cu^{2+}}/n_{SpO}$  is NOT very high, THEN the solution is Red;
- (12) IF  $n_{H^+}/n_{SpO}$  is high AND  $n_{Cu^{2+}}/n_{SpO}$  is NOT very high, THEN the solution is Red;
- (13) IF  $n_{H^+}/n_{SpO}$  is very high AND  $n_{Cu^{2+}}/n_{SpO}$  is NOT very high, THEN the solution is Red;
- (14) IF  $n_{H^+}/n_{SpO}$  is low AND  $n_{Cu^{2+}}/n_{SpO}$  is medium, THEN the solution is Red;
- (15) IF  $n_{H^+}/n_{SpO}$  is low AND  $n_{Cu^{2+}}/n_{SpO}$  is high, THEN the solution is Red.
